# Supplementary material for: Acinetobacter baumannii Bloodstream Infections in the COVID-19 Era: A Comparative Analysis between COVID-19 and Non-COVID-19 Critically Ill Patients
Source: MDPI journal article supplement (doi:10.3390/microorganisms11071811), 2023-07-14
Supplement: s1 [file s1]

**Supplementary Table S1.** Enrollment of patients in the study per study year and group.

|                       | 2020 | 2021 | 2022 | 2023 | Total |
|-----------------------|------|------|------|------|-------|
| COVID-19 patients     | 15   | 47   | 40   | 0    | 102   |
| Non-COVID-19 patients | 8    | 7    | 11   | 5    | 31    |
